# Supplementary material for: Improving systematic rabies surveillance in Cameroon: A pilot initiative and results for 2014-2016
Source: PubMed Central journal article supplement (PMC6126802; doi:10.1371/journal.pntd.0006597), 2018-09-06
Supplement: pntd.0006597.s001.pdf [file pntd.0006597.s001.pdf]

# S1 Supporting Information

Safeu et al. Improving systematic rabies surveillance in Cameroon: a pilot initiative and results for 2014–2016

Figure A: Animal bites notifications per epidemiological week from 2014 to June 2016 in the West region, Cameroon.

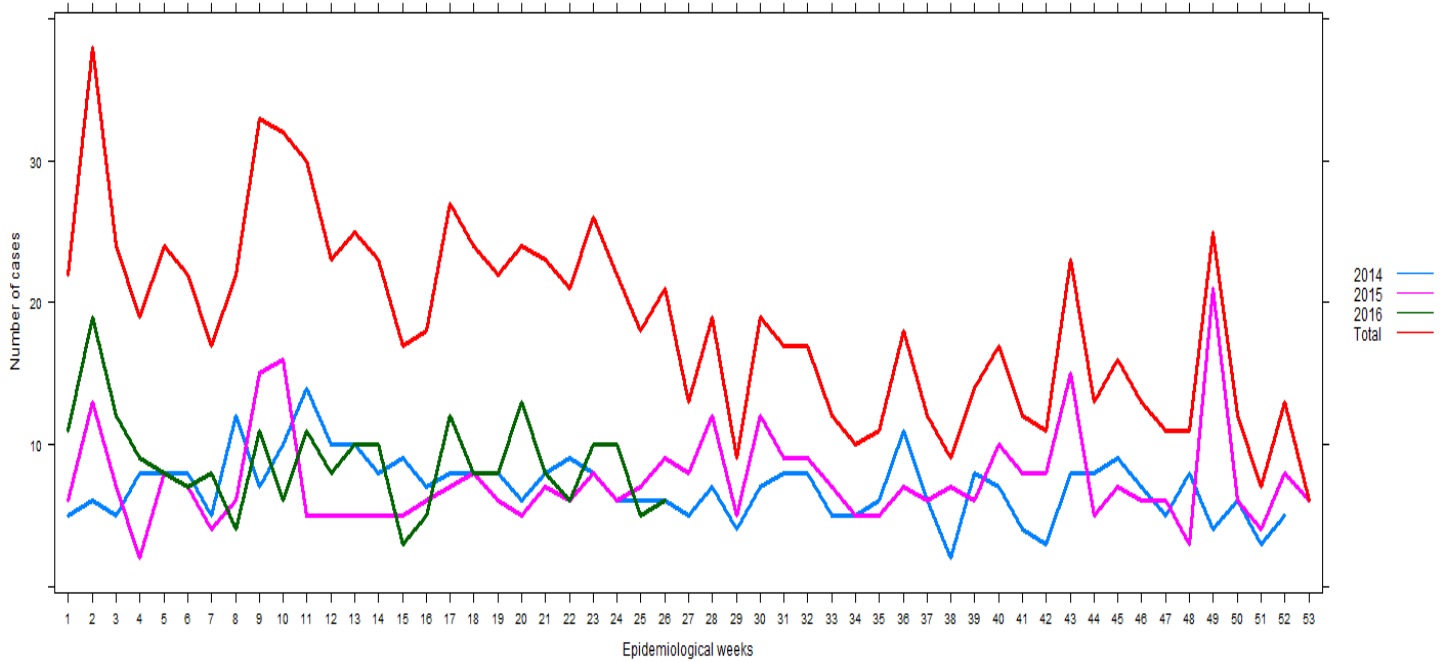

**Table A: Lesion or wound description for animal exposures from 2014 to June 2016 week 26, West region, Cameroon.**

| <b>Characteristics</b>   | <b>Total</b> |          |
|--------------------------|--------------|----------|
|                          | <b>N=925</b> | <b>%</b> |
| Contact type             |              |          |
| Bite                     | 845          | 91.4     |
| Scratches                | 68           | 7.4      |
| Licking                  | 2            | 0.2      |
| Missing                  | 10           | 1.1      |
| Contact site             |              |          |
| Cutaneous                | 822          | 88.9     |
| mucous                   | 6            | 0.6      |
| Missing                  | 97           | 10.5     |
| WHO category             |              |          |
| I                        | 68           | 7.4      |
| II                       | 579          | 62.6     |
| III                      | 139          | 15.0     |
| Missing                  | 139          | 15.0     |
| Interposition of clothes |              |          |
| No                       | 490          | 53.0     |
| Yes                      | 339          | 36.6     |
| Missing                  | 96           | 10.4     |

**Table B: Non-specific post-exposure treatments from 2014 to June 2016 week 26, West region, Cameroon.**

| <b>Characteristics</b>               | <b>Total</b> |          |
|--------------------------------------|--------------|----------|
|                                      | <b>N=925</b> | <b>%</b> |
| Anti-tetanus vaccine                 |              |          |
| No                                   | 536          | 57.9     |
| Yes                                  | 198          | 21.4     |
| Missing                              | 191          | 20.6     |
| Tetanus prevention status            |              |          |
| Up to date                           | 122          | 13.2     |
| Primary vaccination                  | 78           | 8.4      |
| Booster                              | 4            | 0.4      |
| Missing                              | 721          | 77.9     |
| Administration of anti-tetanus serum |              |          |
| No                                   | 161          | 17.4     |
| Yes                                  | 669          | 72.3     |
| Missing                              | 95           | 10.3     |
| Use of antibiotics treatment         |              |          |
| No                                   | 204          | 22.1     |
| Yes                                  | 624          | 67.5     |
| Missing                              | 97           | 10.5     |
