# Supplementary material for: Improving systematic rabies surveillance in Cameroon: A pilot initiative and results for 2014-2016
Source: PubMed Central journal article supplement (PMC6126802; doi:10.1371/journal.pntd.0006597), 2018-09-06
Supplement: pntd.0006597.s003.pdf [file pntd.0006597.s003.pdf]

Mise en place d'un système de recueil d'informations épidémiologiques de base sur la rage dans la région de l'Ouest au Cameroun

**Données considérées : Semaine épidémiologique N°1 année 2014 à la semaine N°26 de l'année 2016**

## 1. Brief synthesis of the epidemiological situation

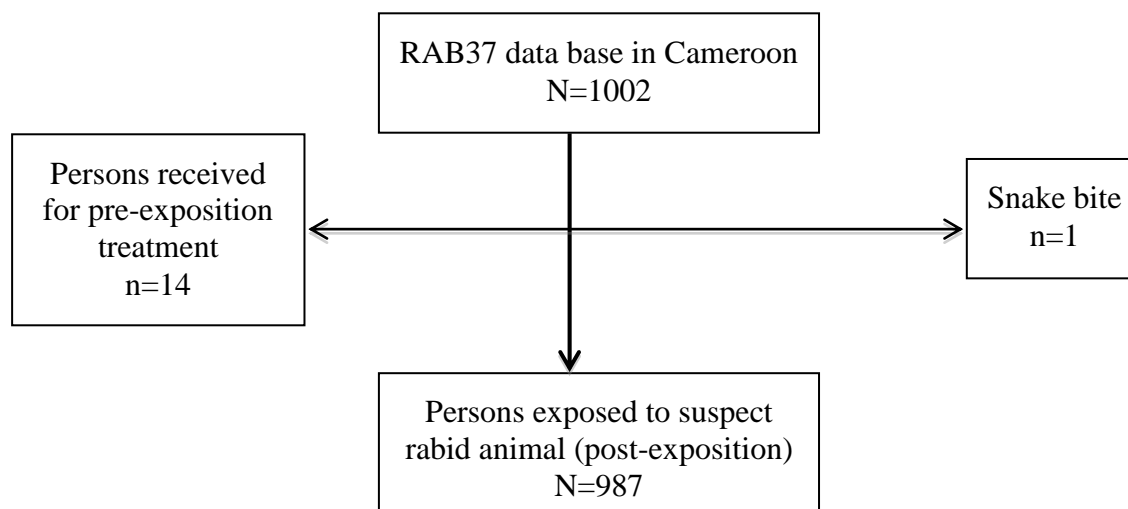

**Table1: Distribution of suspected rabid animal bites cases reported between the first epidemiological week of 2014 and week 26 of 2016 per health district in the Western region of Cameroon, RAB37 CPC-SANOFI PASTEUR**

| District                       | Years      |            |            | Total      |             |
|--------------------------------|------------|------------|------------|------------|-------------|
|                                | 2014       | 2015       | 2016       | N          | %           |
| Bafang                         | 8          | 5          | 24         | 37         | 3.7         |
| Baham                          | 11         | 4          | 7          | 22         | 2.2         |
| Bamendjou                      | 13         | 5          | 10         | 28         | 2.8         |
| Bandja                         | 3          | 3          | 0          | 6          | 0.6         |
| Bandjoun                       | 20         | 11         | 2          | 33         | 3.3         |
| Bangangté                      | 44         | 30         | 12         | 86         | 8.7         |
| Bangourain                     | 3          | 3          | 0          | 6          | 0.6         |
| Batcham                        | 5          | 2          | 2          | 9          | 0.9         |
| Dschang                        | 19         | 13         | 23         | 55         | 5.6         |
| Foumban                        | 10         | 10         | 16         | 36         | 3.6         |
| Foumbot                        | 6          | 5          | 4          | 15         | 1.5         |
| Galim                          | 3          | 2          | 0          | 5          | 0.5         |
| Kekem                          | 13         | 11         | 0          | 24         | 2.4         |
| Kouoptamo                      | 0          | 2          | 1          | 3          | 0.3         |
| Malentouen                     | 5          | 3          | 0          | 8          | 0.8         |
| Mbouda                         | 30         | 31         | 19         | 80         | 8.1         |
| Mifi                           | 166        | 217        | 100        | 483        | 48.9        |
| Penka michel                   | 3          | 30         | 8          | 41         | 4.2         |
| Out of the west region         | 0          | 1          | 0          | 1          | 0.1         |
| Not indicated                  | 2          | 7          | 0          | 9          | 0.9         |
| <b>Total (all districts)</b>   | <b>364</b> | <b>395</b> | <b>228</b> | <b>987</b> | <b>100</b>  |
| <b>Total (RAB37 districts)</b> | <b>337</b> | <b>367</b> | <b>221</b> | <b>925</b> | <b>93.8</b> |

Districts involved in the RAB37 pilot study

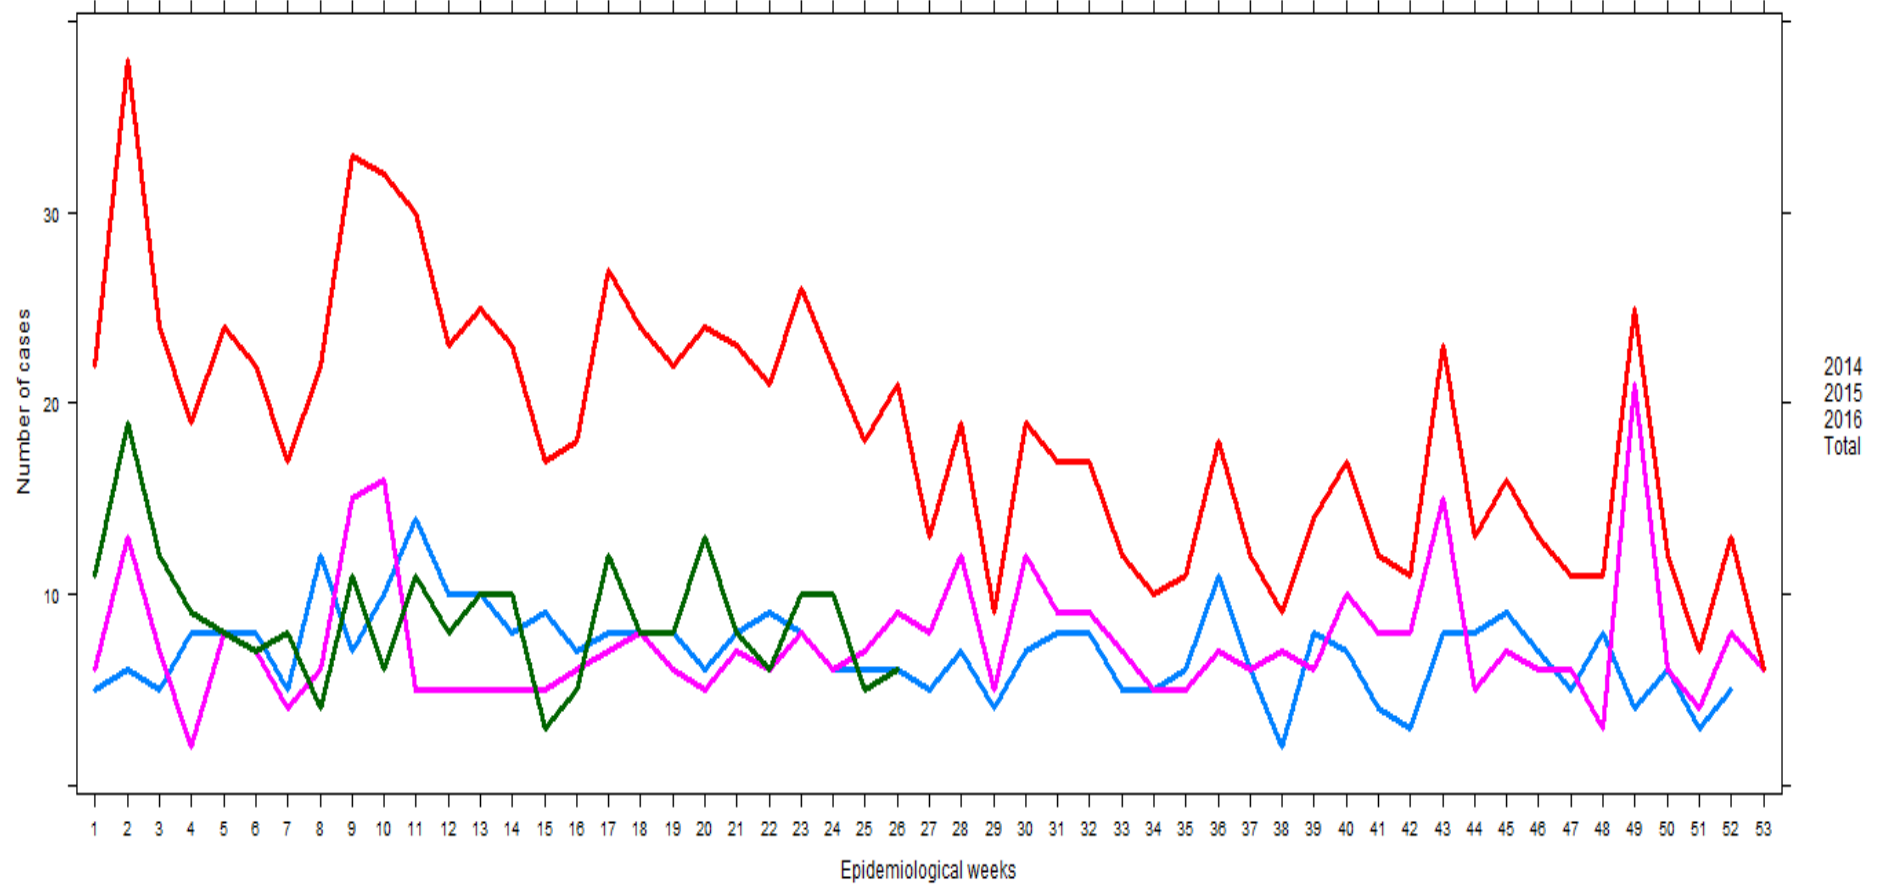

**Figure 1: Suspected Rabid animal bites notification per epidemiological week from 2014 to June 2016 in the West region of Cameroon, RAB37 CPC-SANOFI PASTEUR**

## 2. Animal involved in the bite of human

**Table 2: Distribution of animals involved in the bite of human from 2014 to week 26 June 2016 in the West region of Cameroon, RAB37 CPC-SANOFI**

| Animals         | 2014       |             | 2015       |             | 2016       |             | Total      |              |
|-----------------|------------|-------------|------------|-------------|------------|-------------|------------|--------------|
|                 | n          | %           | n          | %           | n          | %           | N          | %            |
| Dog             | 239        | 93.4        | 305        | 93.3        | 174        | 93.5        | 718        | 93.4         |
| Cat             | 5          | 2.0         | 11         | 3.4         | 6          | 3.2         | 22         | 2.9          |
| Mouse           | 1          | 0.4         | 4          | 1.2         | 1          | 0.5         | 6          | 0.8          |
| Pork            | 2          | 0.8         | 7          | 2.1         | 3          | 1.6         | 12         | 1.6          |
| Domestic monkey | 3          | 1.2         | 0          | 0.0         | 0          | 0.0         | 3          | 0.4          |
| Domestic animal | 2          | 0.8         | 0          | 0.0         | 0          | 0.0         | 2          | 0.3          |
| Donkey          | 1          | 0.4         | 0          | 0.0         | 0          | 0.0         | 1          | 0.1          |
| unknown         | 3          | 1.2         | 0          | 0.0         | 2          | 1.1         | 5          | 0.7          |
| <b>Total</b>    | <b>256</b> | <b>33.3</b> | <b>327</b> | <b>42.5</b> | <b>186</b> | <b>24.2</b> | <b>769</b> | <b>100.0</b> |

Table 2 taking into consideration missing data

| Animals         | 2014       |             | 2015       |             | 2016       |             | Total      |            |
|-----------------|------------|-------------|------------|-------------|------------|-------------|------------|------------|
|                 | n          | %           | n          | %           | n          | %           | N          | %          |
| Dog             | 239        | 70.9        | 305        | 83.1        | 174        | 78.7        | 718        | 77.6       |
| Cat             | 5          | 1.5         | 11         | 3.0         | 6          | 2.7         | 22         | 2.4        |
| Mouse           | 1          | 0.3         | 4          | 1.1         | 1          | 0.5         | 6          | 0.6        |
| Pork            | 2          | 0.6         | 7          | 1.9         | 3          | 1.4         | 12         | 1.3        |
| Domestic monkey | 3          | 0.9         | 0          | 0.0         | 0          | 0.0         | 3          | 0.3        |
| Domestic animal | 2          | 0.6         | 0          | 0.0         | 0          | 0.0         | 2          | 0.2        |
| Donkey          | 1          | 0.3         | 0          | 0.0         | 0          | 0.0         | 1          | 0.1        |
| Unknown         | 3          | 0.9         | 0          | 0.0         | 2          | 0.9         | 5          | 0.5        |
| Missing         | 81         | 24.0        | 40         | 10.9        | 35         | 15.8        | 156        | 16.9       |
| <b>Total</b>    | <b>337</b> | <b>36.4</b> | <b>367</b> | <b>39.7</b> | <b>221</b> | <b>23.9</b> | <b>925</b> | <b>100</b> |

## 3. Characteristics of people bitten by suspect rabid animals.

a) Patient identification, reason and consultation history

**Table 3: Characteristics of people people bitten by suspect rabid animals from 2014 week 26 to June 2016, West region, RAB37 CPC-SANOFI PASTEUR**

| Characteristics                                                       | Total    |      |
|-----------------------------------------------------------------------|----------|------|
|                                                                       | N=925    | %    |
| Sex                                                                   |          |      |
| Female                                                                | 498      | 53.8 |
| Male                                                                  | 416      | 45.0 |
| Missing                                                               | 11       | 1.2  |
| Age: Median [IQR], in years                                           | 20[9-42] |      |
| Missing                                                               | 6        | 0.6  |
| Delay from animal bite to medical consultation: Median [EIQ], in days | 1[0-3]   |      |
| Missing                                                               | 102      | 11.0 |
| Previous history of suspect rabid animals                             |          |      |
| No                                                                    | 822      | 88.9 |
| Yes                                                                   | 73       | 7.9  |
| Missing                                                               | 30       | 3.2  |
| Reason of consultation                                                |          |      |
| Contact with suspect rabid animal                                     | 924      | 99.9 |
| Missing                                                               | 1        | 0.1  |

b) Lesion or wound in human after animal contact

**Table 4: Lesion or wound description in people bitten by suspect rabid animal from 2014 to June 2016, West region, RAB37 CPC-SANOFI PASTEUR**

| Characteristics          | Total |      |
|--------------------------|-------|------|
|                          | N=925 | %    |
| Contact type             |       |      |
| Bite                     | 845   | 91.4 |
| Scratches                | 68    | 7.4  |
| Licking                  | 2     | 0.2  |
| Missing                  | 10    | 1.1  |
| Contact site             |       |      |
| Cutaneous                | 822   | 88.9 |
| mucous                   | 6     | 0.6  |
| Missing                  | 97    | 10.5 |
| WHO category             |       |      |
| I                        | 68    | 7.4  |
| II                       | 579   | 62.6 |
| III                      | 139   | 15.0 |
| Missing                  | 139   | 15.0 |
| Interposition of clothes |       |      |
| No                       | 490   | 53.0 |
| Yes                      | 339   | 36.6 |
| Missing                  | 96    | 10.4 |

**Description of “lesion or wound” with Who category = I or missing** (with the following description, we can review the WHO category in the above Table 4)

| Type contact | WHO category |      |              |      |
|--------------|--------------|------|--------------|------|
|              | I            |      | Missing data |      |
|              | N=68         | %    | N=139        | %    |
| Scratches    | 13           | 19.1 | 12           | 9.3  |
| Licking      | 1            | 1.5  | 1            | 0.8  |
| Bite         | 54           | 79.4 | 116          | 89.9 |
| Total        | 68           | 100  | 129          | 92.8 |
| Contact site |              |      |              |      |
| Cutaneous    | 63           | 100  | 107          | 97.3 |
| Mucous       | 0            | 0    | 3            | 2.7  |
| Total        | 63           | 92.6 | 110          | 79.1 |

c) Description of suspect rabid animals by nurses and physicians

**Table 5: Characteristics of suspect rabid animals from 2014 to June 2016, West region, RAB37 CPC-SANOPI PASTEUR**

| Characteristics                                        | Total |      |
|--------------------------------------------------------|-------|------|
|                                                        | N=925 | %    |
| Suspect rabid animal                                   |       |      |
| No                                                     | 222   | 24.0 |
| Yes                                                    | 637   | 68.9 |
| Missing                                                | 66    | 7.1  |
| Known animal/ known animal owner                       |       |      |
| No                                                     | 260   | 28.1 |
| Yes                                                    | 592   | 64.0 |
| Missing                                                | 73    | 7.9  |
| Vital status of the animal at the time of consultation |       |      |
| alive                                                  | 609   | 65.8 |
| disappeared                                            | 207   | 22.4 |
| killed                                                 | 29    | 3.1  |
| deceased                                               | 11    | 1.2  |
| Missing                                                | 69    | 7.5  |
| animal vaccinated                                      |       |      |
| No                                                     | 458   | 49.5 |
| Yes                                                    | 117   | 12.6 |
| Missing                                                | 350   | 37.8 |
| animal surveillance by veterinarian                    |       |      |
| No                                                     | 605   | 65.4 |
| Yes                                                    | 133   | 14.4 |
| Missing                                                | 187   | 20.2 |
| Laboratory diagnosis of rabies                         |       |      |
| Negative                                               | 2     | 0.2  |
| Positive                                               | 2     | 0.2  |
| Not practised                                          | 650   | 70.3 |
| Missing                                                | 271   | 29.3 |

| Treatment Received | Suspect rabid animal |      |     |      |
|--------------------|----------------------|------|-----|------|
|                    | No                   | %    | Yes | %    |
| No                 | 132                  | 59.5 | 230 | 36.1 |
| Yes                | 90                   | 40.5 | 407 | 63.9 |
| Total              | 222                  | 25.8 | 637 | 74.2 |

d) Non specific treatments administered to people bitten by suspect rabid animals

**Table 6 : Description of Non specific post exposure treatments from 2014 to June 2016, West region, RAB37 CPC-SANOFI PASTEUR week 26**

| Characteristics                      | Total |      |
|--------------------------------------|-------|------|
|                                      | N=925 | %    |
| Anti-tetanus vaccine                 |       |      |
| No                                   | 536   | 57.9 |
| Yes                                  | 198   | 21.4 |
| Missing                              | 191   | 20.6 |
| Tetanus prevention status            |       |      |
| Up to date                           | 122   | 13.2 |
| Primary vaccination                  | 78    | 8.4  |
| Booster                              | 4     | 0.4  |
| Missing                              | 721   | 77.9 |
| Administration of anti-tetanus serum |       |      |
| No                                   | 161   | 17.4 |
| Yes                                  | 669   | 72.3 |
| Missing                              | 95    | 10.3 |
| Use of antibiotics treatment         |       |      |
| No                                   | 204   | 22.1 |
| Yes                                  | 624   | 67.5 |
| Missing                              | 97    | 10.5 |

e) Specific rabies treatments

**Table 7: Post exposure treatment from first epidemiological week 2014 to week 26 of 2016, Western region, RAB37 CPC-SANOFI**

| Characteristics                              | Total |      |
|----------------------------------------------|-------|------|
|                                              | N=925 | %    |
| Post exposition treatment (PET) administered |       |      |
| Yes                                          | 518   | 56   |
| No                                           | 407   | 44   |
| PET completed <sup>§,*</sup>                 |       |      |
| Yes                                          | 282   | 54.4 |
| Missing                                      | 236   | 45.6 |
| PET Protocol <sup>§</sup>                    |       |      |
| ZAGREB                                       | 496   | 95.8 |
| ESSEN                                        | 15    | 2.9  |
| Missing                                      | 7     | 1.3  |
| Vaccine used <sup>§</sup>                    |       |      |
| Verorab®                                     | 496   | 95.7 |
| Antirabique (without precision)              | 5     | 1.0  |
| Missing                                      | 17    | 3.3  |
| Side effect <sup>§</sup>                     |       |      |
| No                                           | 342   | 66.0 |
| Missing                                      | 176   | 34.0 |

<sup>§</sup>Calculated percentage in relation to people treated

\*compilation of data from different pilot sites registers is ongoing. The result would certainly change what we have in the database to date

Table 8: Post exposition treatment and WHO category/clinical suspicion of rabies, RAB37 CPC-SANOFI

|                         | WHO category |      |       |      |       |      |              |      |
|-------------------------|--------------|------|-------|------|-------|------|--------------|------|
|                         | 1            |      | 2     |      | 3     |      | Missing data |      |
|                         | n=68         | %    | n=579 | %    | n=139 | %    | n=139        | %    |
| Post Exposure Treatment |              |      |       |      |       |      |              |      |
| No                      | 41           | 60.3 | 170   | 29.4 | 87    | 62.6 | 109          | 78.4 |
| Yes                     | 27           | 39.7 | 409   | 70.6 | 52    | 37.4 | 30           | 21.6 |

|                         | Suspect rabid animal |      |       |      |              |      |
|-------------------------|----------------------|------|-------|------|--------------|------|
|                         | No                   |      | Yes   |      | Missing data |      |
| Post exposure treatment | n=222                | %    | n=637 | %    | n=66         | %    |
| No                      | 132                  | 59.5 | 230   | 36.1 | 45           | 68.2 |
| Yes                     | 90                   | 40.5 | 407   | 63.9 | 21           | 31.8 |
