# Supplementary material for: Improving systematic rabies surveillance in Cameroon: A pilot initiative and results for 2014-2016
Source: PubMed Central journal article supplement (PMC6126802; doi:10.1371/journal.pntd.0006597), 2018-09-06
Supplement: pntd.0006597.s004.pdf [file pntd.0006597.s004.pdf]

Tableau 1 : Population de la région de l'Ouest selon les districts de santé - 2011

|    | <b>District de santé</b> | <b>Population</b> |
|----|--------------------------|-------------------|
| 1  | BAFANG                   | 92 651            |
| 2  | BAHAM                    | 49 823            |
| 3  | BAMENDJOU                | 48 437            |
| 4  | BANDJA                   | 37 022            |
| 5  | BANDJOUN                 | 111 948           |
| 6  | BANGANGTE                | 110 979           |
| 7  | BANGOURAIN               | 28 970            |
| 8  | BATCHAM                  | 88 069            |
| 9  | DSCHANG                  | 206 652           |
| 10 | FOUMBAN                  | 166 411           |
| 11 | FOUMBOT                  | 57 779            |
| 12 | GALIM                    | 40 647            |
| 13 | KEKEM                    | 38 105            |
| 14 | KOUOPTAMO                | 41 830            |
| 15 | MALENTOUEN               | 69 150            |
| 16 | MASSANGAM                | 21 783            |
| 17 | MBOUDA                   | 244 846           |
| 18 | MIFI                     | 247 925           |
| 19 | PENKA MICHEL             | 86 183            |
| 20 | SANTCHOU                 | 21 438            |
|    | <b>TOTAL</b>             | <b>1 810 648</b>  |
